# Supplementary material
Source: PubMed Central journal article supplement (PMC3504638)
Supplement: NIHMS395807-supplement-01.pdf [file NIHMS395807-supplement-01.pdf]

**Supplemental Table S.1.** Spearman correlations among polycyclic aromatic hydrocarbons (PAHs) in kitchen samples, days 2 and 3 (n=19).

|                                     | Spearman Correlation Coefficients* |      |      |      |      |      |      |      |      |      |      |      |      |       |      |
|-------------------------------------|------------------------------------|------|------|------|------|------|------|------|------|------|------|------|------|-------|------|
|                                     | Nap                                | Flu  | Phe  | Ant  | Fla  | Pyr  | BaA  | Chr  | BbF  | BkF  | BaP  | BeP  | Per  | BghiP | Tot  |
| <b>Naphthalene (Nap)</b>            | 1.00                               |      |      |      |      |      |      |      |      |      |      |      |      |       |      |
| <b>Fluorene (Flu)</b>               | 0.73                               | 1.00 |      |      |      |      |      |      |      |      |      |      |      |       |      |
| <b>Phenanthrene (Phe)</b>           | 0.82                               | 0.76 | 1.00 |      |      |      |      |      |      |      |      |      |      |       |      |
| <b>Anthracene (Ant)</b>             | 0.67                               | 0.88 | 0.85 | 1.00 |      |      |      |      |      |      |      |      |      |       |      |
| <b>Fluoranthene (Fla)</b>           | 0.69                               | 0.78 | 0.93 | 0.87 | 1.00 |      |      |      |      |      |      |      |      |       |      |
| <b>Pyrene (Pyr)</b>                 | 0.68                               | 0.78 | 0.93 | 0.87 | 0.99 | 1.00 |      |      |      |      |      |      |      |       |      |
| <b>Benz[a]anthracene (BaA)</b>      | 0.78                               | 0.74 | 0.94 | 0.79 | 0.94 | 0.95 | 1.00 |      |      |      |      |      |      |       |      |
| <b>Chrysene+Triphenylene (Chr)</b>  | 0.80                               | 0.69 | 0.94 | 0.78 | 0.94 | 0.93 | 0.98 | 1.00 |      |      |      |      |      |       |      |
| <b>Benzo[b]fluoranthene (BbF)</b>   | 0.82                               | 0.71 | 0.94 | 0.77 | 0.91 | 0.89 | 0.97 | 0.98 | 1.00 |      |      |      |      |       |      |
| <b>Benzo[k]fluoranthene (BkF)</b>   | 0.82                               | 0.75 | 0.95 | 0.81 | 0.94 | 0.93 | 0.99 | 0.99 | 0.98 | 1.00 |      |      |      |       |      |
| <b>Benzo[a]pyrene (BaP)</b>         | 0.81                               | 0.81 | 0.92 | 0.84 | 0.90 | 0.91 | 0.96 | 0.93 | 0.92 | 0.96 | 1.00 |      |      |       |      |
| <b>Benzo[e]pyrene (BeP)</b>         | 0.80                               | 0.73 | 0.94 | 0.79 | 0.93 | 0.91 | 0.97 | 0.98 | 0.99 | 0.98 | 0.91 | 1.00 |      |       |      |
| <b>Perylene (Per)</b>               | 0.82                               | 0.76 | 0.90 | 0.80 | 0.87 | 0.88 | 0.94 | 0.92 | 0.91 | 0.95 | 0.97 | 0.89 | 1.00 |       |      |
| <b>Benzo[ghi]perylene (BghiP)</b>   | 0.78                               | 0.76 | 0.94 | 0.81 | 0.95 | 0.94 | 0.99 | 0.98 | 0.98 | 0.99 | 0.96 | 0.98 | 0.93 | 1.00  |      |
| <b>Total PAHs (Tot)<sup>a</sup></b> | 0.97                               | 0.76 | 0.89 | 0.75 | 0.81 | 0.79 | 0.88 | 0.89 | 0.91 | 0.90 | 0.89 | 0.89 | 0.87 | 0.88  | 1.00 |

\*All correlation coefficients are statistically significant at the  $p < 0.05$  level.

<sup>a</sup>Total PAHs is the sum of the 14 PAHs listed.
